# Supplementary material for: Random forest models accurately classify synthetic opioids using high-dimensionality mass spectrometry datasets
Source: Royal Society of Chemistry journal article supplement (doi:10.1039/d5ay01677k), 2026-01-01
Supplement: d5ay01677k1.xlsx [file d5ay01677k1.xlsx]

## Sheet: synthetic_opioids_supp_table1
Supplemental Table 1: List of synthetic opioid standards used to generate GC-MS and/or HRMS/MS data.
Cayman Chemical name	Datafile name	GC-MS	HRMS/MS	BOTH
(±)-cis-3-methyl Butyryl fentanyl (hydrochloride)	racemic-cis-3-methyl-butyryl-fentanyl	X	X	X
(±)-cis-3-methyl Fentanyl (hydrochloride)	racemic-cis-3-methyl-fentanyl	X	X	X
(±)-cis-3-methyl Norfentanyl	racemic-cis-3-methylnorfentanyl	X	X	X
(±)-cis-3-methyl Thiofentanyl (hydrochloride)	racemic-cis-3-methyl-thiofentanyl	X	X	X
(±)-cis-Isofentanyl (hydrochloride)	racemic-cis-isofentanyl	X	X	X
(±)-trans-3-methyl Fentanyl (hydrochloride)	racemic-trans-3-methyl-fentanyl	X	X	X
(±)-trans-3-methyl Thiofentanyl (hydrochloride)	racemic-trans-3-methyl-thiofentanyl	X	X	X
2,2,3,3-tetramethyl-Cyclopropyl fentanyl (hydrochloride)	2,2,3,3-tetramethyl-cyclopropyl fentanyl	X	X	X
2,3-Benzodioxole fentanyl	2,3-benzodioxole fentanyl	X	X	X
2',3'-dimethoxy Fentanyl (hydrochloride)	2',3'-dimethoxy fentanyl	X	X	X
2,3-seco-Fentanyl (hydrochloride)	2,3-seco-fentanyl	X	X	X
2',4'-dimethoxy Fentanyl (hydrochloride)	2',4'-dimethoxy fentanyl	X	X	X
2',5'-dimethoxy Fentanyl (hydrochloride)	2',5'-dimethoxy fentanyl	X	X	X
2',6'-dimethoxy Fentanyl (hydrochloride)	2',6'-dimethoxy fentanyl	X	X	X
2-fluoro MT-45 (hydrochloride)	2-fluoro mt-45	X	X	X
2'-fluoro ortho-Fluorofentanyl (hydrochloride)	2'-fluoro ortho-fluorofentanyl	X	X	X
2'-Fluorofentanyl (hydrochloride)	2'-fluorofentanyl	X	X	X
2-fluoro Viminol	2-fluoro-viminol		X	X
2'-methyl Acetyl fentanyl (hydrochloride)	2'-methyl acetyl fentanyl	X	X	X
2-methyl AP-237 (hydrochloride)	2-methyl ap-237	X	X	X
2'-methyl Fentanyl (hydrochloride)	2'-methyl fentanyl	X	X	X
3',4'-dimethoxy Fentanyl (hydrochloride)	3',4'-dimethoxy fentanyl	X	X	X
3,4-Ethylenedioxy U-47700 (hydrochloride)	3,4-ethylenedioxy u-47700	X	X	X
3,4-Ethylenedioxy U-51754 (hydrochloride)	3,4-ethylenedioxy u-51754	X	X	X
3,4-Methylenedioxy U-47700 (hydrochloride)	3,4-methylenedioxy u-47700	X	X	X
3',5'-dimethoxy Fentanyl (hydrochloride)	3',5'-dimethoxy fentanyl	X	X	X
3'-fluoro ortho-Fluorofentanyl (hydrochloride)	3'-fluoro ortho-fluorofentanyl	X	X	X
3'-Fluorofentanyl (hydrochloride)	3'-fluorofentanyl	X	X	X
3'-methyl Acetyl fentanyl (hydrochloride)	3'-methyl acetyl fentanyl	X	X	X
3'-methyl Fentanyl (hydrochloride)	3'-methyl fentanyl	X	X	X
4-Anilino-1-benzylpiperidine	4-anilino-1-benzylpiperidine	X	X	X
4-Anilino-1-Boc-piperidine	4-anilino-1-boc-piperidine	X	X	X
4-Anilinopiperidine (hydrochloride)	4-anilinopiperidine	X	X	X
4-ANPP	4-anpp	X	X	X
4'-fluoro, para-fluoro (±)-trans-3-methyl Fentanyl (hydrochloride)	4'-fluoro--para-fluoro-racemic-trans-3-methyl-fentanyl	X	X	X
4'-Fluorofentanyl (hydrochloride)	4'-fluorofentanyl	X	X	X
4'-methyl Acetyl fentanyl (hydrochloride)	4'-methyl acetyl fentanyl	X	X	X
4'-methyl Fentanyl (hydrochloride)	4'-methyl fentanyl	X	X	X
4-methyl Fentanyl (hydrochloride)	4-methyl fentanyl	X	X	X
4-Phenyl fentanyl (hydrochloride)	4-phenyl fentanyl	X	X	X
4-phenyl U-51754 (hydrochloride)	4-phenyl u-51754	X	X	X
4-Piperidone (hydrochloride hydrate)	4-piperidone		X
Acetyl fentanyl (hydrochloride)	acetyl fentanyl	X	X	X
Acetyl norfentanyl (hydrochloride)	acetyl norfentanyl	X	X	X
Acrylfentanyl (hydrochloride)	acrylfentanyl	X	X	X
AH 7921	ah 7921	X	X	X
Alfentanil (hydrochloride)	alfentanil	X	X	X
α'-methoxy Fentanyl (hydrochloride)	alpha'-methoxy fentanyl	X	X	X
α-methyl Acetyl fentanyl (hydrochloride)	alpha-methyl acetyl fentanyl	X	X	X
α'-methyl Butyryl fentanyl (hydrochloride)	alpha'-methyl butyryl fentanyl	X	X	X
α-methyl Butyryl fentanyl (hydrochloride)	alpha-methyl butyryl fentanyl	X	X	X
α-methyl Fentanyl (hydrochloride)	alpha-methyl fentanyl	X	X	X
α-methyl Thiofentanyl (hydrochloride)	alpha-methyl thiofentanyl	X	X	X
AP-237 (hydrochloride)	ap-237	X	X	X
AP-238 (hydrochloride)	ap-238	X	X	X
Benzodioxole fentanyl	benzodioxole fentanyl	X	X	X
Benzyl Acrylfentanyl (hydrochloride)	benzyl acrylfentanyl	X	X	X
Benzyl Carfentanil (hydrochloride)	benzyl carfentanil	X	X	X
Benzyl fentanyl (hydrochloride)	benzyl fentanyl	X	X	X
β-hydroxy Fentanyl (hydrochloride)	beta-hydroxy fentanyl	X	X	X
β-Hydroxythioacetylfentanyl	beta-hydroxythioacetylfentanyl	X	X	X
β-Hydroxythiofentanyl (hydrochloride)	beta-hydroxythiofentanyl	X	X	X
β-methyl Acetyl fentanyl (hydrochloride)	beta-methyl acetyl fentanyl	X	X	X
β-methyl Fentanyl (hydrochloride)	beta-methyl fentanyl	X	X	X
β'-Phenyl fentanyl	beta'-phenyl fentanyl	X	X	X
Brorphine	brorphine	X	X	X
Butyryl fentanyl (hydrochloride)	butyryl fentanyl	X	X	X
Butyryl norfentanyl (hydrochloride)	butyryl norfentanyl	X	X	X
Crotonyl fentanyl	crotonyl fentanyl	X	X	X
Cyclobutyl fentanyl (hydrochloride)	cyclobutyl fentanyl	X	X	X
Cyclohexyl fentanyl (hydrochloride)	cyclohexyl fentanyl	X	X	X
Cyclopentenyl fentanyl (hydrochloride)	cyclopentenyl fentanyl	X	X	X
Cyclopentyl fentanyl (hydrochloride)	cyclopentyl fentanyl	X	X	X
Cyclopropaneacetyl fentanyl (hydrochloride)	cyclopropaneacetyl fentanyl	X	X	X
Cyclopropyl fentanyl (hydrochloride)	cyclopropyl fentanyl	X	X	X
Despropionyl 2'-fluoro ortho-Fluorofentanyl	despropionyl 2'-fluoro ortho-fluorofentanyl	X	X	X
Despropionyl meta-Methylfentanyl	despropionyl meta-methylfentanyl	X
Despropionyl ortho-Fluorofentanyl	despropionyl ortho-fluorofentanyl	X	X	X
Despropionyl para-Fluorofentanyl	despropionyl para-fluorofentanyl	X	X	X
Ethoxyacetyl fentanyl (hydrochloride)	ethoxyacetyl fentanyl	X	X	X
Etonitazene	etonitazene	X	X	X
Fentanyl	fentanyl	X	X	X
Fentanyl Carbamate	fentanyl carbamate	X
Fentanyl Methyl Carbamate	fentanyl methyl carbamate	X	X	X
FIBF (hydrochloride)	fibf	X	X	X
Furanyl fentanyl (hydrochloride)	furanyl fentanyl	X	X	X
Furanyl fentanyl 3-furancarboxamide isomer (hydrochloride)	furanyl fentanyl 3-furancarboxamide isomer	X
Furanyl norfentanyl (hydrochloride)	furanyl norfentanyl	X	X	X
Furanylethyl fentanyl (hydrochloride)	furanylethyl fentanyl		X	X
Heptanoyl fentanyl (hydrochloride)	heptanoyl fentanyl	X	X	X
Hexanoyl fentanyl (hydrochloride)	hexanoyl fentanyl	X	X	X
Isobutyryl fentanyl (hydrochloride)	isobutyryl fentanyl	X	X	X
Isopropyl U-47700	isopropyl u-47700	X	X	X
Isotonitazene	isotonitazene	X
Isovaleryl fentanyl (hydrochloride)	isovaleryl fentanyl	X	X	X
meta-fluoro Acrylfentanyl	meta-fluoro-acrylfentanyl	X	X	X
meta-fluoro Furanyl fentanyl (hydrochloride)	meta-fluoro furanyl fentanyl	X	X	X
meta-fluoro Methoxyacetyl fentanyl (hydrochloride)	meta-fluoro-methoxyacetyl-fentanyl	X	X	X
meta-fluoro Valeryl fentanyl (hydrochloride)	meta-fluoro-valeryl-fentanyl	X	X	X
meta-Fluorobutyryl fentanyl (hydrochloride)	meta-fluorobutyryl-fentanyl	X	X	X
meta-Fluorofentanyl (hydrochloride)	meta-fluorofentanyl	X	X	X
meta-Fluoroisobutyryl fentanyl (hydrochloride)	meta-fluoro isobutyryl-fentanyl	X	X	X
meta-methoxy Furanyl fentanyl	meta-methoxy-furanyl-fentanyl	X	X	X
meta-methyl Acetyl fentanyl (hydrochloride)	meta-methyl acetyl fentanyl	X	X	X
meta-methyl Cyclopropyl fentanyl (hydrochloride)	meta-methylcyclopropylfentanyl	X	X	X
meta-Methylfentanyl (hydrochloride)	meta-methylfentanyl	X	X	X
meta-methyl Furanyl fentanyl (hydrochloride)	meta-methyl-furanyl-fentanyl	X	X	X
meta-methyl Methoxyacetyl fentanyl (hydrochloride)	meta-methyl-methoxyacetyl-fentanyl	X	X	X
Methacrylfentanyl	methacrylfentanyl	X	X	X
Methoxyacetyl fentanyl (hydrochloride)	methoxyacetyl fentanyl	X	X	X
Metonitazene (citrate)	metonitazene	X	X	X
MT-45 (hydrochloride)	mt-45	X	X	X
N-(2,5-DMA) Fentanyl (hydrochloride)	n-(2,5-dma) fentanyl	X	X	X
N-(2-APB) Fentanyl	n-(2-apb) fentanyl	X	X	X
N-(2C-B) Fentanyl (hydrochloride)	n-(2c-b) fentanyl	X	X	X
N-(2C-B-fly) Fentanyl (hydrochloride)	n-(2c-b-fly) fentanyl	X	X	X
N-(2C-C) Fentanyl (hydrochloride)	n-(2c-c) fentanyl	X	X	X
N-(2C-D) Fentanyl (hydrochloride)	n-(2c-d) fentanyl	X	X	X
N-(2C-E) Fentanyl (hydrochloride)	n-(2c-e) fentanyl	X	X	X
N-(2C-G) Fentanyl (hydrochloride)	n-(2c-g) fentanyl	X	X	X
N-(2C-I) Fentanyl (hydrochloride)	n-(2c-i) fentanyl	X	X	X
N-(2C-iP) Fentanyl (hydrochloride)	n-(2c-ip) fentanyl	X	X	X
N-(2C-N) Fentanyl (hydrochloride)	n-(2c-n) fentanyl	X	X	X
N-(2C-P) Fentanyl (hydrochloride)	n-(2c-p) fentanyl	X	X	X
N-(2C-T) Fentanyl	n-(2c-t) fentanyl	X	X	X
N-(2C-T-2) Fentanyl (hydrochloride)	n-(2c-t-2) fentanyl	X	X	X
N-(2C-T-4) Fentanyl (hydrochloride)	n-(2c-t-4) fentanyl	X	X	X
N-(2C-T-7) Fentanyl (hydrochloride)	n-(2c-t-7) fentanyl	X	X	X
N-(2C-TFM) Fentanyl (hydrochloride)	n-(2c-tfm) fentanyl	X	X	X
N-(3,4,5-TMA) Fentanyl (hydrochloride)	n-(3,4,5-tma) fentanyl	X	X	X
N-(3C-B-fly) Fentanyl (hydrochloride)	n-(3c-b-fly) fentanyl	X	X	X
N-(3-ethylindole) Norfentanyl	n-(3-ethylindole) norfentanyl	X	X	X
N-(6-APB) Fentanyl	n-(6-apb) fentanyl	X	X	X
N-(6-APDB) Fentanyl	n-(6-apdb) fentanyl	X	X	X
N-(DOB) Fentanyl (hydrochloride)	n-(dob) fentanyl	X	X	X
N-(DOBU) Fentanyl (hydrochloride)	n-(dobu) fentanyl	X	X	X
N-(DOC) Fentanyl (hydrochloride)	n-(doc) fentanyl	X	X	X
N-(DOET) Fentanyl (hydrochloride)	n-(doet) fentanyl	X	X	X
N-(DOI) Fentanyl (hydrochloride)	n-(doi) fentanyl	X	X	X
N-(DOM) Fentanyl (hydrochloride)	n-(dom) fentanyl	X	X	X
N-(MDA) Fentanyl (hydrochloride)	n-(mda) fentanyl	X	X	X
N-(Phentermine) Fentanyl (hydrochloride)	n-(phentermine) fentanyl	X	X	X
N,N-didesmethyl U-47700 (trifluoroacetate salt)	n,n-didesmethyl u-47700 (trifluoroacetate salt)	X	X	X
N,N-Dimethylamido-despropionyl fentanyl	n,n-dimethylamido-despropionyl fentanyl	X	X	X
N-benzyl Furanyl norfentanyl (hydrochloride)	n-benzyl furanyl norfentanyl	X	X	X
N-benzyl para-fluoro Cyclopropyl norfentanyl (hydrochloride)	n-benzyl para-fluoro cyclopropyl norfentanyl	X	X	X
N-benzyl para-fluoro Norfentanyl (hydrochloride)	n-benzyl para-fluoro norfentanyl	X	X	X
N-Benzyl phenyl norfentanyl (hydrochloride)	n-benzyl phenyl norfentanyl	X	X	X
N-Benzyl-4-piperidone	n-benzyl-4-piperidone	X	X	X
N-desmethyl U-47700	n-desmethyl u-47700	X	X	X
N-methyl Cyclopropyl norfentanyl (hydrochloride)	n-methyl cyclopropyl norfentanyl	X	X	X
N-methyl Norcarfentanil (hydrochloride)	n-methyl norcarfentanil	X	X	X
N-methyl Norfentanyl (hydrochloride)	n-methyl norfentanyl	X	X	X
N-methyl U-47931E	n-methylu-47931e	X	X	X
Norcarfentanil (hydrochloride)	norcarfentanil	X	X	X
Norfentanyl	norfentanyl	X	X	X
Norsufentanil	norsufentanil	X	X	X
NPP	npp	X	X	X
Ocfentanil (hydrochloride)	ocfentanil	X	X	X
O-Desmethyl-cis-tramadol (hydrochloride)	o-desmethyl-cis-tramadol	X	X	X
ortho-fluoro Acrylfentanyl (hydrochloride)	ortho-fluoro-acrylfentanyl	X	X	X
ortho-fluoro Furanyl fentanyl (hydrochloride)	ortho-fluoro-furanyl-fentanyl	X	X	X
ortho-fluoro Valeryl fentanyl (hydrochloride)	ortho-fluoro-valeryl-fentanyl	X	X	X
ortho-Fluorobutyryl fentanyl (hydrochloride)	ortho-fluorobutyryl-fentanyl	X	X	X
ortho-Fluorofentanyl (hydrochloride)	ortho-fluorofentanyl	X	X	X
ortho-Fluoroisobutyryl fentanyl (hydrochloride)	ortho-fluoroisobutyryl-fentanyl	X	X	X
ortho-isopropyl Furanyl fentanyl	ortho-isopropyl-furanyl-fentanyl	X	X	X
ortho-methoxy Butyryl fentanyl (hydrochloride)	ortho-methoxy-butyryl-fentanyl	X	X	X
ortho-methoxy Furanyl fentanyl	ortho-methoxy-furanyl-fentanyl	X	X	X
ortho-methyl Acetyl fentanyl (hydrochloride)	ortho-methyl-acetyl-fentanyl	X	X	X
ortho-methyl Acrylfentanyl (hydrochloride)	ortho-methyl-acrylfentanyl	X	X	X
ortho-methyl Cyclopropyl fentanyl (hydrochloride)	ortho-methyl-cyclopropyl-fentanyl	X	X	X
ortho-methyl Furanyl fentanyl	ortho-methyl-furanyl-fentanyl	X	X	X
ortho-methyl Methoxyacetyl fentanyl (hydrochloride)	ortho-methyl-methoxyacetyl-fentanyl	X	X	X
ortho-methyl Phenyl fentanyl (hydrochloride)	ortho-methyl-phenyl-fentanyl	X	X	X
ortho-Methylfentanyl (hydrochloride)	ortho-methylfentanyl	X	X	X
para-Bromofentanyl	para-bromofentanyl	X	X	X
para-chloro Acrylfentanyl (hydrochloride)	para-chloro-acrylfentanyl	X	X	X
para-chloro Cyclobutyl fentanyl (hydrochloride)	para-chloro-cyclobutyl-fentanyl	X	X	X
para-chloro Cyclopentyl fentanyl (hydrochloride)	para-chloro-cyclopentyl-fentanyl	X	X	X
para-chloro Cyclopropyl fentanyl (hydrochloride)	para-chloro-cyclopropyl-fentanyl	X	X	X
para-chloro Furanyl fentanyl	para-chloro-furanyl-fentanyl	X	X	X
para-chloro Furanyl fentanyl 3-furancarboxamide	para-chloro-furanyl-fentanyl-3-furancarboxamide	X	X	X
para-chloro Methoxyacetyl fentanyl (hydrochloride)	para-chloro-methoxyacetyl-fentanyl	X	X	X
para-chloro Valeryl fentanyl (hydrochloride)	para-chloro-valeryl-fentanyl	X	X	X
para-Chloroacetyl fentanyl (hydrochloride)	para-chloroacetyl-fentanyl	X	X	X
para-Chlorobutyryl fentanyl (hydrochloride)	para-chlorobutyryl-fentanyl	X	X	X
para-Chlorofentanyl (hydrochloride)	para-chlorofentanyl	X	X	X
para-Chloroisobutyryl fentanyl (hydrochloride)	para-chloroisobutyryl-fentanyl	X	X	X
para-fluoro 4-ANBP	para-fluoro-4-anbp	X	X	X
para-fluoro Acrylfentanyl	para-fluoro-acrylfentanyl	X	X	X
para-fluoro Crotonyl fentanyl	para-fluoro-crotonyl-fentanyl	X	X	X
para-fluoro Cyclopentyl fentanyl (hydrochloride)	para-fluoro-cyclopentyl-fentanyl	X	X	X
para-fluoro Cyclopropyl fentanyl (hydrochloride)	para-fluoro-cyclopropyl-fentanyl	X	X	X
para-fluoro Furanyl fentanyl (hydrochloride)	para-fluoro-furanyl-fentanyl	X	X	X
para-fluoro Furanyl fentanyl 3-furancarboxamide (hydrochloride)	para-fluoro-furanyl-fentanyl-3-furancarboxamide	X	X	X
para-fluoro Methoxyacetyl fentanyl (hydrochloride)	para-fluoro-methoxyacetyl-fentanyl	X	X	X
para-fluoro Tetrahydrofuran fentanyl (hydrochloride)	para-fluoro-tetrahydrofuran-fentanyl	X	X	X
para-fluoro Valeryl fentanyl (hydrochloride)	para-fluoro-valeryl-fentanyl	X	X	X
para-Fluoroacetyl fentanyl (hydrochloride)	para-fluoroacetyl-fentanyl	X	X	X
para-Fluorobutyryl fentanyl (hydrochloride)	para-fluorobutyryl-fentanyl	X	X	X
para-Fluorofentanyl (hydrochloride)	para-fluorofentanyl	X	X	X
para-hydroxy Butyryl fentanyl	para-hydroxy-butyryl-fentanyl	X	X	X
para-methoxy Acetyl fentanyl (hydrochloride)	para-methoxyacetylfentanyl	X	X	X
para-methoxy Acrylfentanyl (hydrochloride)	para-methoxy-acrylfentanyl	X	X	X
para-methoxy Butyryl fentanyl (hydrochloride)	para-methoxy-butyryl-fentanyl	X	X	X
para-methoxy Furanyl fentanyl (hydrochloride)	para-methoxy-furanyl-fentanyl	X	X	X
para-methoxy Methoxyacetyl fentanyl (hydrochloride)	para-methoxymethoxyacetylfentanyl	X	X	X
para-methoxy Tetrahydrofuran fentanyl (hydrochloride)	para-methoxy-tetrahydrofuran-fentanyl	X	X	X
para-methoxy Valeryl fentanyl (hydrochloride)	para-methoxy-valeryl-fentanyl	X	X	X
para-Methoxyfentanyl (hydrochloride)	para-methoxyfentanyl	X	X	X
para-methyl Acetyl fentanyl (hydrochloride)	para-methyl-acetyl-fentanyl	X	X	X
para-methyl Acrylfentanyl (hydrochloride)	para-methyl-acrylfentanyl	X	X	X
para-methyl Butyryl fentanyl (hydrochloride)	para-methylbutyrylfentanyl	X	X	X
para-methyl Cyclopentyl fentanyl (hydrochloride)	para-methylcyclopentylfentanyl	X	X	X
para-methyl Cyclopropyl fentanyl (hydrochloride)	para-methyl-cyclopropyl-fentanyl	X	X	X
para-methyl Furanyl fentanyl (hydrochloride)	para-methyl-furanyl-fentanyl	X	X	X
para-methyl Isobutyryl fentanyl (hydrochloride)	para-methyl-isobutyryl-fentanyl	X	X	X
para-methyl Methoxyacetyl fentanyl (hydrochloride)	para-methyl-methoxyacetyl-fentanyl	X	X	X
para-methyl Tetrahydrofuran fentanyl (hydrochloride)	para-methyl-tetrahydrofuran-fentanyl	X	X	X
para-Methylfentanyl (hydrochloride)	para-methylfentanyl	X	X	X
para-Toluoyl fentanyl (hydrochloride)	para-toluoyl fentanyl	X	X	X
Phenoxyacetyl fentanyl (hydrochloride)	phenoxyacetyl fentanyl	X	X	X
Phenyl fentanyl (hydrochloride)	phenyl fentanyl	X	X	X
Phenylacetyl fentanyl (hydrochloride)	phenylacetyl fentanyl	X	X	X
Piperidylthiambutene (hydrochloride)	piperidylthiambutene	X	X	X
Pivaloyl fentanyl (hydrochloride)	pivaloyl fentanyl	X	X	X
Propyl U-47700	propyl u-47700	X	X	X
Remifentanil (hydrochloride)	remifentanil	X	X	X
Remifentanil Acid (trifluoroacetate salt)	remifentanilacid	X	X	X
Senecioylfentanyl	senecioylfentanyl	X	X	X
Sufentanil	sufentanil	X	X	X
Tetrahydrofuran fentanyl (hydrochloride)	tetrahydrofuran fentanyl		X
Tetrahydrofuran fentanyl 3-tetrahydrofurancarboxamide (hydrochloride)	tetrahydrofuran-fentanyl-3-tetrahydrofurancarboxamide	X	X	X
Tetrahydrothiophene fentanyl	tetrahydrothiophene fentanyl	X
Thienyl fentanyl (hydrochloride)	thienyl fentanyl	X	X	X
Thiofentanyl (hydrochloride)	thiofentanyl	X	X	X
Thiophene fentanyl (hydrochloride)	thiophene fentanyl	X	X	X
Thiophene fentanyl 3-thiophenecarboxamide (hydrochloride)	thiophene fentanyl 3-thiophenecarboxamide	X	X	X
Tianeptine (sodium salt)	tianeptine		X
Tigloyl fentanyl	tigloyl fentanyl	X	X	X
U-47700	u-47700	X	X	X
U-47931E	u-47931e	X	X	X
U-48520	u-48520	X	X	X
U-48753E (maleate)	u-48753e	X	X	X
U-48800 (hydrochloride)	u-48800	X	X	X
U-49900	u-49900	X	X	X
U-50488 (hydrochloride)	u-50488	X	X	X
U-51754 (hydrochloride)	u-51754	X	X	X
Valeryl fentanyl (hydrochloride)	valeryl fentanyl	X	X	X
	sum	245	245	242

## Sheet: non-opioids_supp_table2
Supplemental Table 2: List of non-opioid standards used to generate GC-MS and/or HRMS/MS data
Datafile name	GC-MS	HRMS/MS	BOTH
1 naphthaleneacetamide	X
2 imidazolidinethione	X
3 hydroxybiphenyl	X
4,4' dichlorobenzophenone	X
acenaphthene	X
acephate	X	X	X
acetamiprid	X	X	X
acetochlor	X
acibenzolar s methyl	X
aclonifen	X	X	X
acrylamide		X
alachlor	X	X	X
aldicarb nh4		X
aldicarb sulfone		X
aldrin	X
allethrin		X
allidochlor		X
ametryn	X	X	X
aminocarb		X
aminopyralid		X
anilofos	X	X	X
aspon	X	X	X
atraton	X	X	X
atrazine		X
atrazine desethyl		X
azamethiphos	X	X	X
azinphos ethyl	X	X	X
aziprotryne	X	X	X
azobenzene	X
azoxystrobin	X	X	X
benalaxyl	X	X	X
bendiocarb		X
benfuracarb		X
benodanil	X	X	X
benoxacor	X	X	X
bensulide		X
bentazone	X
benz[a]anthracene	X
benzene, 1 bromo 4 phenoxy	X
benzene, 1 chloro 4 phenoxy	X
benzene, 1 methyl 2,4 dinitro	X
benzo[k]fluoranthene	X
benzoximate		X
benzoylprop ethyl	X	X	X
benzyl butyl phthalate	X
benzyladenine	X	X	X
beta bhc	X
bifenazate	X	X	X
bioallethrin		X
bioresmethrin	X	X	X
bis(2 ethylhexyl) phthalate	X
bitertanol		X
bolstar		X
boscalid	X	X	X
bromacil		X
bromfenvinfos	X	X	X
bromophos ethyl	X	X	X
bromoxynil	X
brompyrazon	X
bromuconazole	X	X	X
bupirimate	X	X	X
buprofezin	X	X	X
butachlor	X	X	X
butafenacil	X	X	X
butoxycarboxim		X
butralin	X	X	X
buturon	X	X	X
butyl benzyl phthalate		X
butylate		X
cadusafos		X
carbaryl	X	X	X
carbazole	X
carbendazim		X
carbetamide	X	X	X
carbofuran		X
carboxin	X	X	X
carpropamid	X	X	X
chlorbufam	X	X	X
chlordimeform		X
chlorfenethol	X
chlorfluazuron		X
chloridazon	X	X	X
chlorimuron ethyl		X
chlormequat		X
chlorotoluron		X
chlorphoxim		X
chlorpropham	X
chlorpyrifos	X	X	X
chlorpyrifos methyl		X
chlorsulfuron		X
chlorthion	X	X	X
chlorthiophos	X	X	X
chlortoluron	X
cinidon ethyl	X	X	X
cinosulfuron		X
clomazone		X
cloprop	X
clopyralid	X
clothianidin		X
coumaphos	X	X	X
coumatetralyl	X	X	X
crimidine		X
crufomate	X	X	X
cumyluron		X
cyanazine	X	X	X
cyanophenphos	X	X	X
cyazofamid		X
cycloate		X
cyclosulfamuron		X
cycloxydim		X
cycluron	X	X	X
cypermethrin	X	X	X
cyphenothrin	X	X	X
cyproconazole	X	X	X
cyprodinil	X	X	X
cyromazine	X	X	X
cythioate	X	X	X
dazomet		X
deet diethyltoluamide		X
demeton methyl		X
demeton methyl sulfone		X
demeton s		X
demeton s methyl sulfone	X
desmedipham		X
desmetryn	X	X	X
di butyl phthalate		X
di n octyl phthalate	X
diafenthiuron		X
dialifor	X	X	X
diallate total		X
dibenzothiophene	X
dibutyl phthalate	X
dicamba	X
dicapthon		X
dichlofenthion		X
dichlofluanid	X	X	X
dichlorobenzamide		X
dichlorvos		X
diclobutrazol	X	X	X
dicloran	X
dicrotophos	X	X	X
dicyclohexyl phthalate		X
dieldrin	X
diethofencarb	X	X	X
diethylphthalate	X
diflufenican	X	X	X
dimefox		X
dimepiperate	X	X	X
dimethachlor	X	X	X
dimethametryn	X	X	X
dimethenamid	X	X	X
dimethirimol	X	X	X
dimethoate	X	X	X
dimethomorph	X	X	X
dimethyl phthalate	X	X	X
diniconazole		X
dinitramine	X	X	X
dinoseb	X
dinotefuran		X
dinoterb	X
dioxabenzofos		X
dioxacarb	X	X	X
diphenamid	X	X	X
diphenylamine		X
dipropetryn	X	X	X
disulfoton		X
disulfoton sulfone	X	X	X
ditalimfos	X	X	X
dithiopyr	X	X	X
diuron		X
dmst	X
docosane	X
dodemorph		X
dodine		X
eicosane	X
emamectin b1a benzoate		X
emamectin b1b benzoate		X
endosulfan i	X
endosulfan ii	X
epn	X
epoxiconazole		X
eptc		X
etaconazole	X	X	X
ethidimuron	X	X	X
ethiofencarb	X	X	X
ethiofencarb sulfoxide		X
ethion	X	X	X
ethiprole		X
ethirimol	X	X	X
ethofumesate	X	X	X
ethoprophos ethoprop		X
ethoxyquin		X
ethoxysulfuron		X
ethylene thiourea		X
etobenzanid	X	X	X
etofenprox	X	X	X
etrimfos		X
famoxadone	X
famphur	X	X	X
fenamiphos sulfoxide		X
fenamiphos sulphone	X	X	X
fenazaquin	X	X	X
fenbuconazole	X	X	X
fenchlorfos	X
fenfuram		X
fenhexamide	X	X	X
fenitrothion	X	X	X
fenobucarb	X	X	X
fenoxanil	X	X	X
fenoxycarb	X	X	X
fenpropathrin	X	X	X
fenpropidin	X	X	X
fenpropimorph	X	X	X
fenpyroximate		X
fensulfothion	X	X	X
fenthion	X	X	X
fenthion sulfone	X	X	X
fenthion sulfoxide		X
fentrazamide		X
fenuron	X	X	X
flamprop isopropyl	X	X	X
flamprop methyl	X	X	X
florasulam		X
fluazifop butyl	X	X	X
fluazuron		X
flubenzimine		X
fluchloralin	X
fludioxonil	X	X	X
flufenacet	X	X	X
flufenoxuron		X
flumetsulam		X
flumiclorac pentyl		X
fluometuron	X	X	X
fluoranthene	X
fluorochloridone	X	X	X
fluoroglycofen ethyl ester	X	X	X
fluridone	X	X	X
flurtamone	X	X	X
flusilazole	X	X	X
fluthiacet methyl	X	X	X
flutolanil	X	X	X
flutriafol	X	X	X
folpet	X
fonofos		X
forchlorfenuron pos		X
fuberidazole	X	X	X
furalaxyl	X	X	X
furathiocarb		X
furmecyclox		X
haloxyfop etotyl		X
haloxyfop methyl	X	X	X
hexachlorobenzene	X
hexachlorocyclopentadiene	X
hexadecane	X
hexazinone	X	X	X
hexythiazox		X
hydramethylnon		X
imazalil		X
imazamethabenz methyl	X	X	X
imazapic		X
imazaquin		X
imazethapyr		X
imibenconazole	X	X	X
imibenconazole desbenzyl		X
imidacloprid		X
indeno[1,2,3 cd]pyrene	X
indoxacarb	X	X	X
iprobenfos	X	X	X
isazophos		X
isocarbamid	X	X	X
isofenphos		X
isomethiozin		X
isoprocarb		X
isopropalin	X	X	X
isoprothiolane	X	X	X
isoproturon	X	X	X
isouron		X
kadethrin	X	X	X
kresoxim methyl	X	X	X
lactofen	X	X	X
linuron	X	X	X
loxynil	X
malaoxon		X
malathion	X	X	X
maleic hydrazide		X
mcpb	X
mecarbam	X	X	X
mecoprop	X
mefenacet	X	X	X
mefenpyr diethyl	X	X	X
mepanipyrim	X	X	X
mephosfolan	X	X	X
mepiquat chloride		X
mepronil	X	X	X
metalaxyl	X	X	X
metalaxyl m		X
metamitron	X	X	X
metazachlor		X
metconazole	X	X	X
methabenzthiazuron		X
methamidophos		X
methfuroxam	X	X	X
methomyl		X
methoprotryne	X	X	X
methoxyfenozide		X
methyl paraoxon		X
methyl stearate	X
metobromuron	X	X	X
metolachlor	X
metolcarb		X
metosulam		X
metoxuron		X
metribuzin	X	X	X
mevinphos		X
molinate		X
monalide	X	X	X
monolinuron	X	X	X
monuron	X	X	X
myclobutanil		X
naphthalene, 2 chloro	X
napropamide	X	X	X
neburon		X
nemacur sulfoxide	X
nicotine		X
nitenpyram		X
nitralin	X	X	X
norflurazon	X	X	X
nuarimol	X	X	X
octadecane	X
ofurace	X	X	X
omethoate		X
oryzalin	X
oxamyl	X
oxycarboxin		X
oxydemeton methyl		X
oxyfluorfen	X	X	X
p,p' dde	X
p,p' ddt	X
paclobutrazol	X	X	X
pebulate		X
penconazole	X	X	X
pencycuron		X
phenanthrene	X
phenmedipham		X
phenol, 2 methyl, 4,6 dinitro	X
phenol, 3,4,5 trimethyl , methylcarbamate	X
phenthoate	X	X	X
phorate		X
phorate sulfone	X	X	X
phorate sulfoxide		X
phosalone	X	X	X
phosfolan	X	X	X
phosphamidon	X	X	X
phoxim		X
picolinafen		X
picoxystrobin	X	X	X
piperonyl butoxide nh4		X
piperophos	X	X	X
pirimicarb	X	X	X
pirimiphos ethyl	X	X	X
pirimiphos methyl	X	X	X
pretilachlor	X	X	X
prochloraz	X	X	X
procymidone	X
profenophos		X
prometon	X	X	X
prometryn	X	X	X
pronamide		X
propachlor		X
propamocarb	X	X	X
propanil	X	X	X
propaquizafop		X
propargite	X	X	X
propazine		X
propetamphos	X	X	X
propham		X
propiconazole		X
propisochlor		X
propoxur		X
propylene thiourea		X
propyzamide	X
prosulfocarb		X
pymetrozin	X	X	X
pyraclofos	X	X	X
pyraclostrobine	X	X	X
pyrazophos	X	X	X
pyrazosulfuron ethyl		X
pyrazoxyfen		X
pyrene	X
pyrethrin I		X
pyrethrin II		X
pyributicarb	X	X	X
pyridafenthion	X
pyridafol	X
pyridaphenthion		X
pyrifenox	X	X	X
pyriftalid		X
pyrimethanil	X	X	X
pyrimidifen		X
pyriproxyfen	X	X	X
pyrithiobac sodium		X
pyroquilon	X	X	X
quinalphos	X	X	X
quinoclamine	X	X	X
quinoxyfen		X
quizalofop ethyl	X	X	X
rabenzazole	X	X	X
resmethrin	X	X	X
rotenone	X	X	X
s,s,s tributyl phosphorotrithioate	X
sebuthylazine	X	X	X
secbumeton	X	X	X
simeconazole	X	X	X
simeton	X	X	X
simetryn	X	X	X
spinosad A		X
spinosad D		X
spirodiclofen	X	X	X
succinic acid di butyl ester		X
sulfentrazone	X
sulfotepp		X
sulprofos	X
tau fluvalinate		X
tebuconazole	X	X	X
tebufenozide		X
tebupirimphos		X
tebutam		X
tebuthiuron	X	X	X
temefos	X	X	X
tepp		X
tepraloxydim		X
terbucarb		X
terbufos		X
terbufos sulfone	X	X	X
terbumeton	X	X	X
terbuthylazine		X
terbutryn	X	X	X
tert butylamine		X
tetrachlorvinphos	X	X	X
tetraconazole	X	X	X
tetracosane	X
tetradecane	X
tetramethrin	X	X	X
thenylchlor	X	X	X
thiabendazole	X	X	X
thiacloprid	X	X	X
thiamethoxam		X
thiazopyr	X	X	X
thifensulfuron methyl		X
thiobencarb	X	X	X
thiodicarb		X
thiofanox nh4		X
thiofanox sulfoxide		X
thiometon		X
thionazin		X
thiophanate		X
thiophanate methyl		X
tolclofos methyl	X	X	X
tralkoxydim	X	X	X
trans permethrin	X
triadimefon	X	X	X
triadimenol	X	X	X
triallate		X
triazophos	X	X	X
triazoxide		X
tributyl phosphate	X	X	X
trichlorfon		X
tridemorph		X
trietazine	X	X	X
trifloxystrobin	X	X	X
triisobutyl phosphate		X
triticonazole	X	X	X
uniconazole	X	X	X
vamidothion	X	X	X
vamidothion sulfone		X
vegadex thioallate		X
vernolate		X
vinclozoline	X
sum	294	400	216
